1 **Reported COVID-19 Incidence in Wisconsin High School Athletes**  
2 **During Fall 2020**

3  
4 Phillip Sasser, MD, MS,<sup>1</sup> Timothy McGuine, PhD, LAT,<sup>2</sup> Kristin Haraldsdottir, PhD,<sup>2</sup> Kevin  
5 Biese, MA, LAT,<sup>3</sup> Leslie Goodavish, PA,<sup>2</sup> Bethany Stevens,<sup>3</sup> Andrew M. Watson, MD, MS<sup>2</sup>

6  
7 From the Departments of Pediatrics,<sup>1</sup> Orthopedics and Rehabilitation,<sup>2</sup>  
8 University of Wisconsin School of Medicine and Public Health, Madison, WI, and  
9 The Department of Kinesiology,<sup>2</sup> University of Wisconsin – Madison

10  
11  
12  
13  
14  
15  
16  
17  
18  
19  
20  
21  
22  
23

Address for Correspondence:

Andrew Watson

Department of Orthopedics and Rehabilitation, Division of Sports Medicine

1685 Highland Avenue

Madison, WI 53705

Phone: (608) 263-6477

Fax: (608) 263-0503

Email: [Watson@ortho.wisc.edu](mailto:Watson@ortho.wisc.edu)

24 **Contributorship Statement:**

25 Drs. Sasser, Watson, McGuine and Haraldsdottir, Ms. Goodavish and Mr. Biese conceptualized  
26 the study, data collection, data analysis and interpretation, drafted the manuscript, and approved  
27 the final manuscript as submitted. Ms. Stevens contributed to the data collection, data analysis  
28 and interpretation, reviewed the manuscript and approved the final manuscript as submitted.

29 **ABSTRACT**

30 **Introduction:** The purpose of this study was to describe the reported incidence of COVID-19 in  
31 Wisconsin high school athletes in September 2020, and to investigate the relationship of  
32 COVID-19 incidence with sport and face mask use.

33 **Methods:** Surveys were sent to athletic directors of all Wisconsin high schools regarding sports  
34 during September 2020. The association between reported case rates in athletes in each county  
35 and the county general population were evaluated with a weighted linear model. Multivariable  
36 negative binomial regression models evaluated the associations between COVID-19 incidence  
37 and sport type and face mask use by players, adjusting for the county COVID-19 incidence for  
38 each school.

39 **Results:** 207 schools that had reinitiated sport reported 270 COVID-19 cases among 30,074  
40 players, for case and incidence rates of 809 cases per 100,000 players and 32.6 cases per 100,000  
41 player-days, respectively. The case rates for athletes in each county were positively correlated  
42 with the case rates for the county's general population ( $\beta=1.14\pm 0.20$ ,  $r=0.60$ ,  $p<0.001$ ). One  
43 hundred fifteen (55%) of cases were attributed to household contact, 85 (41%) to contact outside  
44 sport or school, 5 (2.4%) to school contact, and 1 (0.5%) to sport contact. No difference was  
45 identified between team and individual sports (incidence rate ratio (IRR)=1.03 [95% CI=0.49-  
46 2.2],  $p=0.93$ ) or between non-contact and contact sports (IRR=0.53 [0.23-1.3],  $p=0.14$ ), although  
47 the difference between outdoor and indoor sports approached statistical significance (IRR=0.52  
48 [0.26-1.1],  $p=0.07$ ). 84% of schools required face masks while playing. For those sports with  
49 >50 participating schools, there were no significant associations between COVID-19 incidence  
50 and face mask use in cross country (IRR=0.71 [0.2-2.2],  $p=0.52$ ), football (IRR=1.6 [0.6-5.1],

51 p=0.404), boys soccer (IRR=2.3 [0.5-17], p=0.31), or girls volleyball (IRR=1.4 [0.3-6.6],  
52 p=0.64).

53 **Conclusions:** Incidence of reported COVID-19 among athletes was related to background  
54 county incidence and most cases were attributed to household and community contact. Although  
55 not statistically significant, reported COVID-19 incidence may be lower in outdoor sports. Face  
56 mask use did not have a significant benefit, which may be due to relatively low rates of COVID-  
57 19 and the small number of schools that did not report using face masks.

58

59 **Keywords:** adolescent; infection; pediatric; SARS-CoV-2

## 60 INTRODUCTION

61 The COVID-19 pandemic has caused unprecedented changes to the daily lives of people  
62 of all ages globally. Sports throughout the country have been shut down or altered in varying  
63 ways depending on the local county or state ordinances. In Wisconsin, youth sports were  
64 effectively canceled by the Safer At Home order in March 2020.<sup>1</sup> With the order overturned by  
65 the Wisconsin Supreme Court in May 2020, counties throughout the state instituted their own  
66 restrictions.<sup>2,3</sup> Youth sports were restarted in certain counties around the state during the summer  
67 of 2020, while others did not reinstate.<sup>4</sup>

68 There has been a dearth of information regarding the risk of COVID-19 infection and  
69 sport participation. However, it is widely accepted that transmission of the SARS-CoV-2 virus  
70 that causes COVID-19 is related to direct exposure to respiratory droplets and airborne  
71 transmission.<sup>5,6</sup> Longer periods of time in close proximity to infected individuals may increase  
72 transmission risk, and high intensity exercise may potentiate the spread of respiratory droplets,  
73 according to the United States Center for Disease Control and Prevention (CDC).<sup>5</sup> National,  
74 state, and local regulations have all suggested an associated higher transmission risk with contact  
75 sports, indoor sports and team sport participation.<sup>7</sup> Little direct evidence from sports exists to  
76 support this. Media reports of COVID-19 transmission within youth sports are a cause for  
77 concern, although it is often unclear whether the risk is due to sport participation or gatherings  
78 peripheral to or separate from the sports arena.<sup>8,9</sup> A recent study in a soccer club from  
79 Washington state found physically distanced youth soccer training to be safe and did not  
80 contribute to COVID-19 spread among child and adolescent participants.<sup>10</sup> Another preprint  
81 publication regarding club soccer players nationwide found no difference in reported COVID-19  
82 incidence among athletes participating in contact versus non-contact soccer.<sup>11</sup> Finally, a third

83 preprint study of data collected from high school athletic directors nationwide found that,  
84 although COVID-19 incidence was higher among indoor sports, very few cases of COVID-19  
85 were reportedly attributable to sport contact and the overwhelming majority were attributed to  
86 household and community contacts.<sup>12</sup>

87 Several recommendations to minimize COVID-19 risk in youth sports have been  
88 published since the onset of the pandemic by various academic organizations, public health  
89 agencies, and national sport governing bodies.<sup>7,13,14,15,16</sup> However, because little data is directly  
90 available for sport contexts, these recommendations are largely based on inpatient COVID-19  
91 data, case studies, and expert opinion. Risk mitigation recommendations vary widely and the  
92 debate around facemask use while playing sports continues.<sup>17</sup> The CDC and American Academy  
93 of Pediatrics (AAP) recommend against the use of facemasks during play if they inhibit  
94 breathing, become wet, or become a choking hazard, but strongly recommend the use of  
95 facemasks any time while not in the act of playing a sport.<sup>14,18</sup> Therefore, the purpose of this  
96 study is to describe the incidence of reported COVID-19 in high school sports in Wisconsin and  
97 to understand the associations between COVID-19 incidence and sport type as well as face mask  
98 use among athletes.

99

## 100 **METHODS**

### 101 **Study Design**

102 All procedures performed in this study were deemed exempt from by the Institutional  
103 Review Board of the University of Wisconsin-Madison. In collaboration with the Wisconsin  
104 Interscholastic Athletics Association (WIAA), surveys were distributed to all high school athletic  
105 directors on October 1, 2020. In addition to school name and location, athletic directors were

106 asked whether they had restarted participation in sports since the initial COVID-19 restrictions in  
107 the spring of 2020. Those schools that reported reinitiating sports were asked to provide the  
108 specific sports and the date of restarting, number of athletes, number of practices and games, and  
109 number of COVID-19 cases among athletes within each sport, as well as the reported sources of  
110 infections (if known) during the month of September 2020. Schools were asked about their type  
111 of instruction during September (virtual or in-person) and whether they required the use of face  
112 masks for players while playing. Schools were included if they had any sport that had restarted  
113 participation during September 2020.

#### 114 **Statistical Analysis**

115 Data were initially evaluated using descriptive statistics, including estimates of central  
116 tendency (mean, median) and variability (standard deviation, interquartile range, range) for  
117 continuous variables, and counts and percentages for categorical variables. Reported COVID-19  
118 case rates were expressed as the number of reported cases per 100,000 players ( $\text{cases} / \text{total}$   
119  $\text{number of players} * 100,000$ ) overall and for each sport. Duration of participation for each sport  
120 at each school was determined as the difference in days between the date of restarting and  
121 October 1, 2020, and player-days was determined as the product of the number of participating  
122 players and duration. Reported COVID-19 incidence rates were expressed as the number of  
123 reported cases per 100,000 player-days ( $\text{cases} / \text{total number of player-days} * 100,000$ ) overall  
124 and for each sport, with confidence intervals calculated using an exact method.

125 In addition, the number of cases, total population, case rate and incidence rate during  
126 September were determined for each county in which a respondent high school was located from  
127 publicly available online information from the local health authority. In order to determine  
128 whether background county COVID-19 case rates were associated with reported COVID-19 case

129 rates among high school athletes, the total number of athletes and reported COVID-19 cases  
130 were aggregated by county. For those counties with >100 athletes, the relationship between  
131 COVID-19 case rates among high school athletes and the general population were evaluated with  
132 a linear model weighted for the total population of each county.

133 For those sports with data from 50 or more schools, the relative risk of each sport was  
134 evaluated using a mixed effects negative binomial regression model to predict the number of  
135 COVID-19 cases for each team with local incidence, instructional delivery type, and sport as  
136 fixed effects, the log of player-days as an offset, and school as a random effect, yielding an  
137 incidence rate ratio (IRR) with “Cheer / Dance” as the reference (since this represented the  
138 median unadjusted incidence rate). To evaluate the relationship between reported COVID-19  
139 incidence and sport characteristics, a multivariable negative binomial regression model was  
140 developed to predict the number of cases, with local incidence, sport location (indoor, outdoor),  
141 sport contact (contact, non-contact), sport type (team, individual), and school instructional  
142 delivery type as covariates, and the log of player-days as an offset.

143 To evaluate the association between overall COVID-19 incidence and reported face mask  
144 use, incidence rates and 95% confidence intervals were calculated within each sport with greater  
145 than 50 reporting schools for those reporting face mask use or not. Separate multivariable  
146 negative binomial regression models were then developed to predict the number of cases, with  
147 local incidence, instructional delivery type, and face mask use (yes/no) as covariates, and the log  
148 of player-days as an offset. Coefficients from the models were exponentiated to represent IRRs  
149 for binary variables and Wald confidence intervals were generated. Significance level was  
150 determined *a priori* at the 0.05 level and all tests were 2-tailed. All statistical analyses were  
151 performed in R.



152

## 153 **RESULTS**

154 Two hundred forty-four schools submitted complete survey responses, of which 207 had  
155 restarted a fall sport. These schools represented 30,074 student-athletes that had participated in  
156 16,898 practices and 4,378 games. One hundred eighty-seven schools (90.3%) reported utilizing  
157 in-person instruction during September 2020. Among the schools that had restarted participation,  
158 270 cases of COVID-19 were reported, yielding a case rate of 892 cases per 100,000 athletes and  
159 an incidence rate of 32.6 (95% CI = 28.9-36.8) cases per 100,000 player-days. From September 6  
160 to October 4, 2020, 2390 cases of COVID-19 were reported among 14-17 year-olds in  
161 Wisconsin, for a case rate of 1067 cases per 100,000 people and an incidence of 38.1 cases per  
162 100,000 person-days.<sup>19</sup> Of the cases with a reported known source, 115 (55%) were attributed to  
163 household contact followed by community contact outside sport or school (85, 41%), school  
164 contact (5, 2.4%), sport contact (1, 0.5%) and other (3, 1.4%). For those sports with greater than  
165 50 participating schools, the incidence rate ranged from 13.3 (Tennis – Girls) to 45.2 cases per  
166 100,000 player-days (Football), as shown in Figure 1 (full data available in Supplemental Table  
167 1).

168 When aggregated by county, the case rates for athletes in each county were significantly  
169 and positively correlated with the case rates for their respective county's general population  
170 ( $\beta=1.14\pm0.20$ ,  $r=0.60$ ,  $p<0.001$ ; see Figure 2). The IRRs for specific sports, adjusted for state  
171 COVID-19 incidence, instruction delivery type and school repeated measures are shown in  
172 Figure 3. The IRRs for school instructional delivery and sport characteristics are shown in Table  
173 1. One hundred seventy-three schools (84%) reported face mask use by players while playing  
174 sports. Unadjusted incidence for teams with and without reported face mask use within each

175 sport with greater than 50 respondent schools are shown in Figure 4. After adjusting for local  
176 county COVID-19 incidence and school instructional delivery, face mask use was not associated  
177 with a decreased COVID-19 incidence in football, girls' volleyball, boys' soccer or cross country  
178 (Table 2).

179

## 180 **DISCUSSION**

181 In this statewide survey study of high school athletes, we did not identify a statistically  
182 significant association between COVID-19 incidence and sport type after adjusting for local  
183 virus incidence and school instructional delivery. Girls' tennis, girls' golf and cross country  
184 reported the lowest adjusted incidence rates of COVID-19, while football reported the highest.  
185 Nonetheless, the confidence intervals around these estimates were wide, perhaps due to the  
186 relatively low incidence of COVID-19 in Wisconsin during this period. There were no  
187 independent, statistically significant differences in reported COVID-19 incidence between indoor  
188 versus outdoor sports, contact versus non-contact sports, or individual versus team sports.  
189 However, indoor and contact sport classification approached significance, suggesting that this  
190 relationship may become clearer with a larger sample during a period of higher COVID-19  
191 incidence. In fact, a recent preprint publication among high school athletes nationwide  
192 demonstrated this relationship over a longer time period when background COVID-19 rates were  
193 higher throughout the country.<sup>12</sup>

194 We found that case rates of reported COVID-19 in high school athletes were significantly  
195 related to the case rates of their respective county's general population, and very similar to the  
196 overall COVID-19 incidence rate among 14-17 year olds in Wisconsin during roughly the same  
197 time frame. In addition, 96% of the cases among athletes had a reported source of infection from

198 household and community contacts, and only 1 (0.5%) from a known sport contact. This may  
199 suggest that the background, local COVID-19 incidence may have a greater effect on overall  
200 COVID-19 incidence among high school athletes than participation in a specific sport or type of  
201 sport.

202         Reported face mask use among the sports with the largest number of respondent schools  
203 (football, girls' volleyball, boys' soccer, and cross country) did not have a significant  
204 relationship with COVID-19 incidence. While this is similar to the findings among outdoor  
205 sports in a recent nationwide sample of high school athletes, it is in contrast to the finding from  
206 that study that facemask use was associated with decreased COVID-19 incidence among indoor  
207 sports.<sup>12</sup> The overwhelming majority of the respondent schools in the present study (84%)  
208 reported facemask use while on the field or court. Together with the relatively low background  
209 COVID-19 incidence rates during September, this may have limited our ability to identify a true  
210 relationship between mask use and reported COVID-19 incidence.

211         Similarly, we did not find a relationship between COVID-19 incidence and type of  
212 instructional delivery (in-person, virtual). Of the cases with a reported known source, only 2.5%  
213 were attributed to a school contact. This is consistent with prior reports that schools have not  
214 been significant contributors to the spread of COVID-19.<sup>20</sup> However, 90% of our respondent  
215 schools reported in-person instruction, making it difficult to fully evaluate the role of in-person  
216 school instruction in COVID-19 incidence among high school athletes. Nonetheless, we included  
217 school instruction type within our adjusted models in order to account for this as a potential  
218 confounder. Importantly, it should be recognized that this study cannot account for transmission  
219 or incidence of COVID-19 among attendees at high school sporting events beyond the  
220 participants. This represents an important potential contributor to community COVID-19 risk,

221 and risk mitigation procedures should continue to be prioritized to protect both athletes and  
222 attendees.

223

## 224 **Limitations**

225 This study has several limitations. We are unable to verify the information provided by  
226 athletic directors through a separate independent source. Local, county-level daily COVID-19  
227 case data was often not available for adolescents or children, so our adjusted models could only  
228 account for the population-level background incidence from each county. Nonetheless, we found  
229 that reported case rates from our sample and the case rates from the county general populations  
230 were highly related. It is difficult to fully interpret comparisons of COVID-19 cases reported by  
231 athletic directors and those collected by public health agencies, but we have included public  
232 health data to add context for our findings and to adjust our incidence models. As mentioned  
233 above, the incidence of COVID-19 was relatively low during September 2020 in Wisconsin, and  
234 this may have limited our ability to detect statistically significant associations in some cases.  
235 Reported sources of infection were provided by the schools themselves and it is unknown  
236 whether these represent the results of formal contact tracing by local health authorities. Finally,  
237 this data represents information regarding athletes from a single state and may not be  
238 generalizable to other populations.

239

## 240 **Conclusions**

241 After adjusting for local county COVID-19 incidence, no statistically significant  
242 differences in reported COVID-19 incidence were identified between sports or sport types  
243 among Wisconsin high school athletes during September 2020. Reported COVID-19 case rates

244 among athletes were highly correlated with case rates for the general population for their  
245 respective counties, and incidence rates among athletes were very similar to those of 14-17 year  
246 olds in Wisconsin in general. Most cases among athletes were attributed to household and  
247 community contact with very few attributed to school or sport contacts. Further research is  
248 warranted to better define the risk factors for COVID-19 transmission during adolescent sport  
249 participation and the relative benefits of different risk mitigation strategies.

250

## 251 **ACKNOWLEDGEMENTS**

252           There are no funding sources to report for this study. Dr. Watson serves as the Chief  
253 Medical Advisor for the Elite Clubs National League and is supported by grants from the  
254 National Center for Advancing Translational Sciences (UL1TR002373; KL2TR002374). We are  
255 grateful for the resources and support of the UW Institute for Clinical and Translational  
256 Research. Dr. McGuine serves on the Sports Medicine Advisory Council for the National  
257 Federation of State High School Associations. There are no other relevant conflicts of interest to  
258 disclose.

259 **REFERENCES**

- 260 1. COVID-19: Badger Bounce Back. Wisconsin Department of Health Services. Published  
261 March 21, 2020. Accessed January 26, 2021. [https://www.dhs.wisconsin.gov/covid-](https://www.dhs.wisconsin.gov/covid-19/prepare.html)  
262 [19/prepare.html](https://www.dhs.wisconsin.gov/covid-19/prepare.html)
- 263 2. Molly Beck, Patrick Marley. Wisconsin Supreme Court rules to strike down Evers' stay-at-  
264 home order. Milwaukee Journal Sentinel. Published May 13, 2020. Accessed February 2,  
265 2021. [https://www.jsonline.com/story/news/politics/2020/05/13/wisconsin-supreme-court-](https://www.jsonline.com/story/news/politics/2020/05/13/wisconsin-supreme-court-strikes-down-tony-evers-coronavirus-orders/5179205002/)  
266 [strikes-down-tony-evers-coronavirus-orders/5179205002/](https://www.jsonline.com/story/news/politics/2020/05/13/wisconsin-supreme-court-strikes-down-tony-evers-coronavirus-orders/5179205002/)
- 267 3. Viviani N, Danbeck J. Dane Co. issues a "Safer at Home"-style order after state one was  
268 struck down. <https://www.nbc15.com>. Accessed February 2, 2021.  
269 [https://www.nbc15.com/content/news/With-Safer-at-Home-struck-down-Dane-County-](https://www.nbc15.com/content/news/With-Safer-at-Home-struck-down-Dane-County-issues-its-own-similar-order-570452141.html)  
270 [issues-its-own-similar-order-570452141.html](https://www.nbc15.com/content/news/With-Safer-at-Home-struck-down-Dane-County-issues-its-own-similar-order-570452141.html)
- 271 4. Heinrich J. Current Order | Public Health Madison & Dane County, Public Health Madison  
272 & Dane County. Madison & Dane County Public Health. Accessed January 26, 2021.  
273 </coronavirus/forward-dane/current-order>
- 274 5. CDC. Coronavirus Disease 2019 (COVID-19) - Transmission. Centers for Disease Control  
275 and Prevention. Published October 28, 2020. Accessed January 26, 2021.  
276 <https://www.cdc.gov/coronavirus/2019-ncov/prevent-getting-sick/how-covid-spreads.html>
- 277 6. Furukawa NW, Brooks JT, Sobel J. Evidence Supporting Transmission of Severe Acute  
278 Respiratory Syndrome Coronavirus 2 While Presymptomatic or Asymptomatic. *Emerg*  
279 *Infect Dis.* 2020;26(7). doi:10.3201/eid2607.201595
- 280 7. CDC. COVID-19 and Your Health. Centers for Disease Control and Prevention. Published  
281 February 11, 2020. Accessed January 26, 2021. [https://www.cdc.gov/coronavirus/2019-](https://www.cdc.gov/coronavirus/2019-ncov/daily-life-coping/playing-sports.html)  
282 [ncov/daily-life-coping/playing-sports.html](https://www.cdc.gov/coronavirus/2019-ncov/daily-life-coping/playing-sports.html)
- 283 8. Sweeney E. Thirteen COVID-19 cases connected to youth ice hockey camp in New  
284 Hampshire - The Boston Globe. BostonGlobe.com. Published September 2, 2020. Accessed  
285 January 26, 2021. [https://www.bostonglobe.com/2020/09/02/metro/thirteen-covid-19-cases-](https://www.bostonglobe.com/2020/09/02/metro/thirteen-covid-19-cases-connected-youth-ice-hockey-camp-new-hampshire/)  
286 [connected-youth-ice-hockey-camp-new-hampshire/](https://www.bostonglobe.com/2020/09/02/metro/thirteen-covid-19-cases-connected-youth-ice-hockey-camp-new-hampshire/)
- 287 9. Lazar K. Mounting clusters in youth sports, pandemic fatigue complicate fight against  
288 coronavirus in Mass. - The Boston Globe. BostonGlobe.com. Published November 4, 2020.  
289 Accessed January 26, 2021. [https://www.bostonglobe.com/2020/11/04/metro/mounting-](https://www.bostonglobe.com/2020/11/04/metro/mounting-clusters-youth-sports-pandemic-fatigue-complicate-fight-against-coronavirus-mass/)  
290 [clusters-youth-sports-pandemic-fatigue-complicate-fight-against-coronavirus-mass/](https://www.bostonglobe.com/2020/11/04/metro/mounting-clusters-youth-sports-pandemic-fatigue-complicate-fight-against-coronavirus-mass/)
- 291 10. Drezner JA, Drezner SM, Magner KN, Ayala JT. COVID-19 Surveillance in Youth Soccer  
292 During Small Group Training: A Safe Return to Sports Activity. *Sports Health.*  
293 2021;13(1):15-17. doi:10.1177/1941738120964458

- 294 11. Watson A, Haraldsdottir K, Biese K, Goodavish L, Stevens B, McGuine T. COVID-19 in  
295 Youth Soccer. *medRxiv*. Published online January 1, 2020:2020.09.25.20201616.  
296 doi:10.1101/2020.09.25.20201616
- 297 12. Watson AM, Haraldsdottir K, Biese K, Goodavish L, Stevens B, McGuine T. The  
298 Association of COVID-19 Incidence with Sport and Face Mask Use in United States High  
299 School Athletes. *medRxiv*. Published online January 20, 2021:2021.01.19.21250116.  
300 doi:10.1101/2021.01.19.21250116
- 301 13. Asif IM, Chang CJ, Diamond AB, Raukar N, Zaremski JL. Returning Athletes Back to  
302 High School Sports in the COVID-19 Era: Preparing for the Fall. *Sports Health*.  
303 2020;12(6):518-520. doi:10.1177/1941738120953851
- 304 14. COVID-19 Interim Guidance: Return to Sports. American Academy of Pediatrics.  
305 Accessed January 26, 2021. [http://services.aap.org/en/pages/2019-novel-coronavirus-covid-  
306 19-infections/clinical-guidance/covid-19-interim-guidance-return-to-sports/](http://services.aap.org/en/pages/2019-novel-coronavirus-covid-19-infections/clinical-guidance/covid-19-interim-guidance-return-to-sports/)
- 307 15. Recommendations for Returning to Play in a Training Environment. Elite Clubs National  
308 League. Published May 26, 2020. Accessed January 26, 2021.  
309 [https://www.theecn.com/wp-  
310 content/uploads/2020/09/ECNL\\_x\\_Return\\_to\\_Play\\_Recs\\_V5.pdf](https://www.theecn.com/wp-content/uploads/2020/09/ECNL_x_Return_to_Play_Recs_V5.pdf)
- 311 16. COVID-19 Return-to-Sport Considerations for Secondary School Athletic Trainers.  
312 National Athletic Trainer Association. Published May 2020. Accessed January 26, 2021.  
313 [https://www.nata.org/sites/default/files/covid\\_19\\_return-to-  
314 sport\\_considerations\\_for\\_secondary\\_school\\_ats\\_1.pdf](https://www.nata.org/sites/default/files/covid_19_return-to-sport_considerations_for_secondary_school_ats_1.pdf)
- 315 17. Karissa Neihoff. Mitigation Efforts Must Intensify as Winter Sports, Performing Arts  
316 Begin. National Federation of State High School Associations. Published January 27, 2021.  
317 Accessed February 2, 2021. [https://www.nfhs.org/articles/mitigation-efforts-must-intensify-  
318 as-winter-sports-performing-arts-begin/](https://www.nfhs.org/articles/mitigation-efforts-must-intensify-as-winter-sports-performing-arts-begin/)
- 319 18. CDC. Considerations for Wearing Masks. Centers for Disease Control and Prevention.  
320 Published December 18, 2020. Accessed January 26, 2021.  
321 [https://www.cdc.gov/coronavirus/2019-ncov/prevent-getting-sick/cloth-face-cover-  
322 guidance.html](https://www.cdc.gov/coronavirus/2019-ncov/prevent-getting-sick/cloth-face-cover-guidance.html)
- 323 19. COVID-19: Wisconsin Cases. Wisconsin Department of Health Services. Published  
324 February 17, 2021. Accessed February 17, 2021. [https://www.dhs.wisconsin.gov/covid-  
325 19/cases.htm](https://www.dhs.wisconsin.gov/covid-19/cases.htm)
- 326 20. Falk A, Benda A, Falk P, Steffen S, Wallace Z, Høeg TB. COVID-19 Cases and  
327 Transmission in 17 K–12 Schools — Wood County, Wisconsin, August 31–November 29,  
328 2020. *MMWR Morb Mortal Wkly Rep*. 2021;70(4):136-140.  
329 doi:10.15585/mmwr.mm7004e3

330

331 Figure Legends.

332

333 Figure 1. Unadjusted incidence rates of COVID-19 during September 2020 for various sports  
334 from Wisconsin high schools. Incidence rate is shown as reported cases per 100,000 player-days  
335 for those sports with greater than 50 schools reporting restarting. Red, dashed line represents the  
336 COVID-19 incidence rate among 14-17 year-olds in Wisconsin from 9/6 to 10/5/2020 (data  
337 extracted from <https://www.dhs.wisconsin.gov/covid-19/cases.htm#youth> on 2/5/2021).

338 Figure 2. Reported COVID-19 case rates for Wisconsin high school athletes and the general  
339 population of their respective counties during September 2020. Size of points scaled to  
340 population of each county and dashed line represents a line of equality. Solid line and shaded  
341 area represent regression line and 95% confidence interval from linear model weighted for  
342 population of each county.  $r$  = correlation coefficient.

343 Figure 3. COVID-19 incidence rate ratios during September 2020 for Wisconsin high school  
344 sports, adjusted for local (state) COVID-19 incidence, instructional delivery type and repeated  
345 measures from the same school. Includes those sports with greater than 50 schools reporting  
346 participation, with Cheer/Dance as reference. \* $p < 0.05$ .

347 Figure 4. Unadjusted COVID-19 incidence rates reported among Wisconsin athletes in  
348 September 2020, comparing teams with or without reported face mask use, within each sport.  
349 Includes those sports with greater than 50 reporting schools.

350



351 Table 1. Incidence rate ratios for reported COVID-19 cases among Wisconsin high schools in  
352 fall 2020 by school instructional delivery and sport characteristics.

|                                           | IRR (95% CI)     | p     |
|-------------------------------------------|------------------|-------|
| School instructional delivery (in-person) | 1.33 (0.74-2.4)  | 0.34  |
| Outdoor                                   | 0.52 (0.26-1.1)  | 0.072 |
| Team                                      | 1.03 (0.49-2.2)  | 0.93  |
| Non-Contact                               | 0.53 (0.23-1.26) | 0.14  |

353 <sup>a</sup>Incidence rate ratios and Wald confidence intervals from a mixed effects negative binomial  
354 regression to predict COVID-19 cases with local incidence, instructional delivery type, and sport  
355 characteristics as fixed effects, school as a random effect and log(player-days) as an offset; CI =  
356 Confidence Interval; IRR=Incidence Rate Ratio.

357

358 Table 2. The association of reported face mask use with COVID-19 incidence within each sport  
359 among Wisconsin high school athletes during September 2020.<sup>a</sup>

|                    | IRR (95% CI) <sup>a</sup> | p     |
|--------------------|---------------------------|-------|
| Cross Country      | 0.706 (0.24-2.2)          | 0.524 |
| Football           | 1.58 (0.57-5.1)           | 0.404 |
| Soccer - Boys      | 2.34 (0.52-17)            | 0.307 |
| Volleyball - Girls | 1.37 (0.3-6.6)            | 0.641 |

360 <sup>a</sup>Incidence rate ratios and Wald confidence intervals from separate multivariable negative  
361 binomial regression models within each sport to predict COVID-19 cases with local incidence,  
362 instructional delivery type, and face mask use (yes/no) as fixed effects, and log(player-days) as  
363 an offset. CI = Confidence Interval; IRR=Incidence Rate Ratio.

364

365

366

367

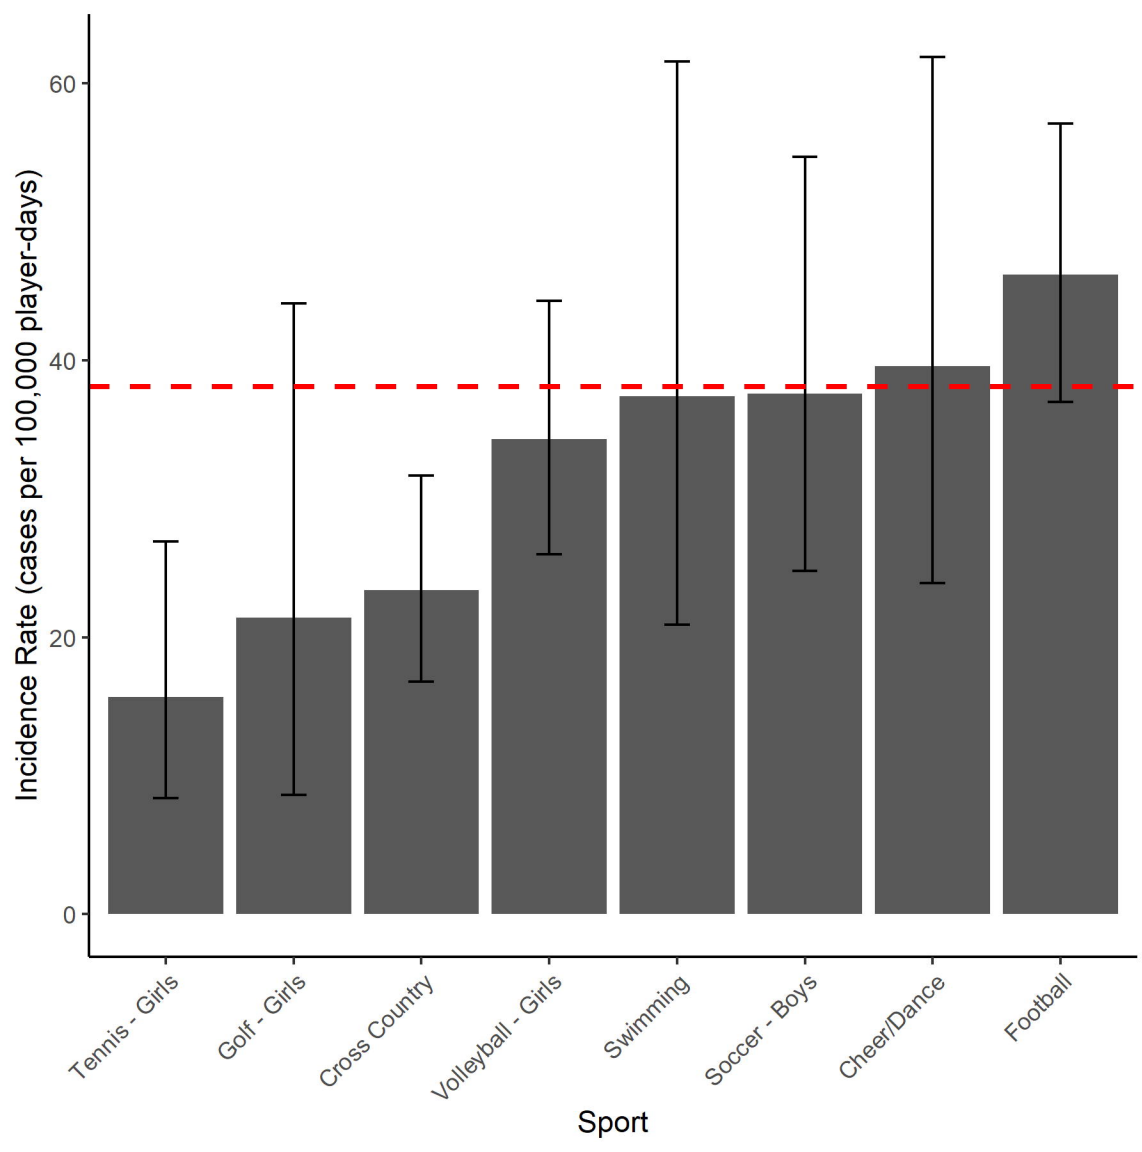

High School Cases per 100,000 Athletes

$r = 0.602$   
 $p < 0.001$

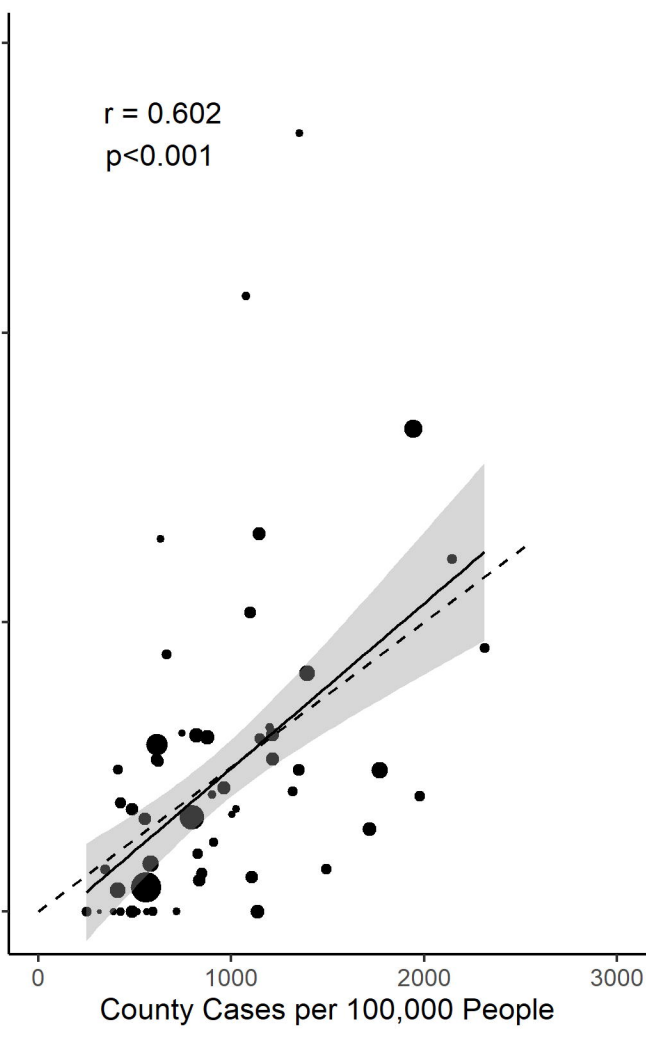

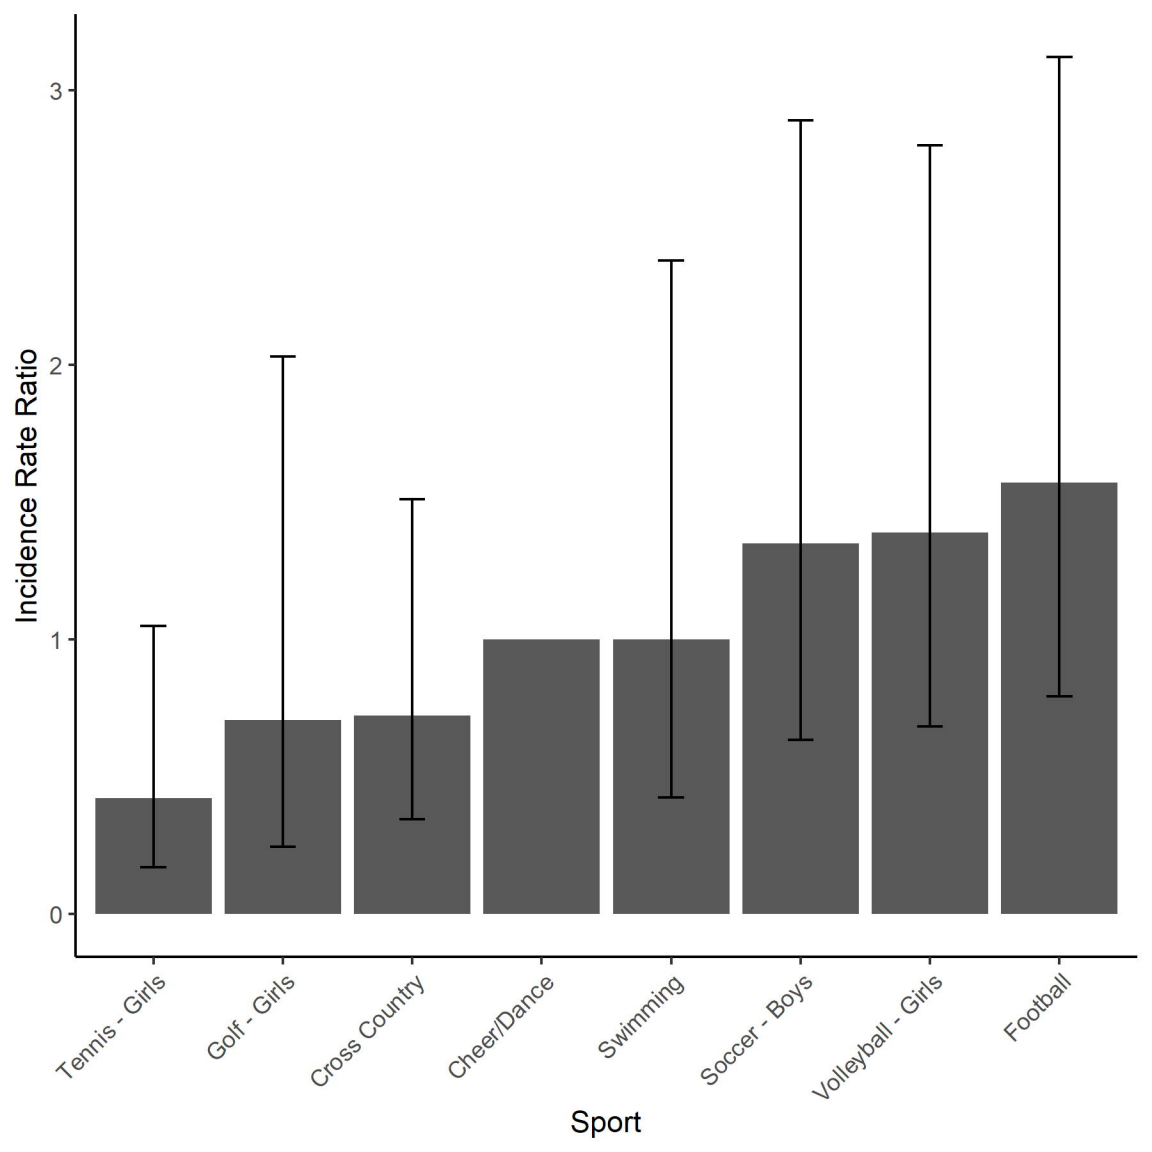

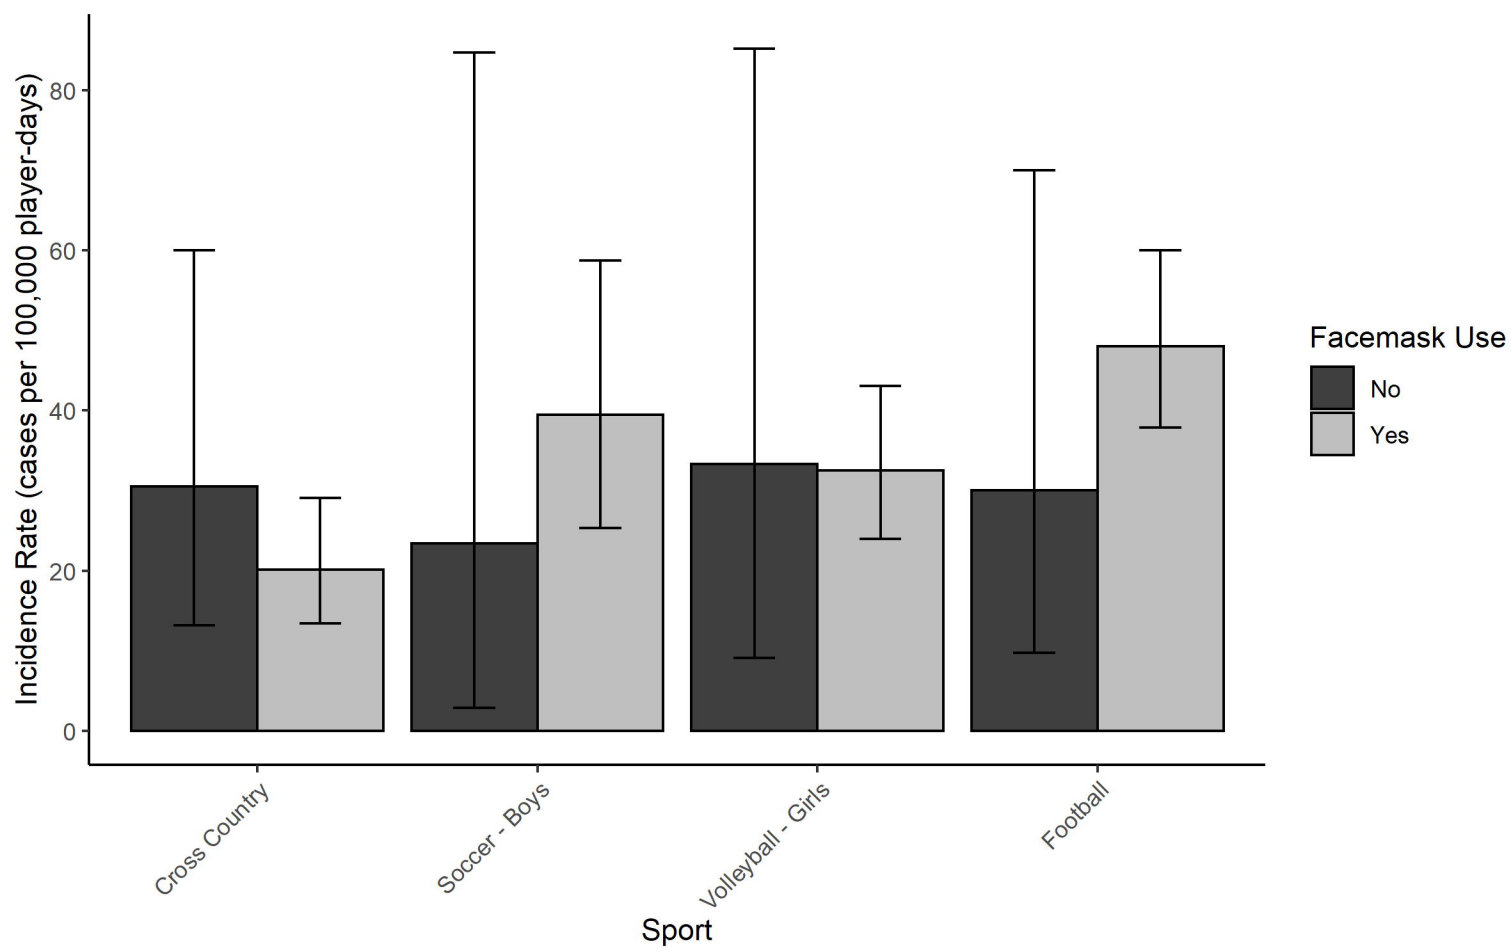

Source: https://www.medrxiv.org/content/10.1101/2021.02.18.21251986v1.full.pdf
